# Supplementary material
Source: PubMed Central journal article supplement (PMC6181642)
Supplement: NIHMS170810-supplement-Erratum.pdf [file NIHMS170810-supplement-Erratum.pdf]

## A Comparison of the Physical and Chemical Differences Between Cancellous and Cortical Bovine Bone Mineral at Two Ages

Liisa T. Kuhn · Marc D. Gryn timerpas · Christian C. Rey ·  
Yaotang Wu · Jerome L. Ackerman ·  
Melvin J. Glimcher

Published online: 11 March 2009  
© Springer Science+Business Media, LLC 2009

### Erratum to: Calcif Tissue Int (2008) 83(2): 146–154 DOI 10.1007/s00223-008-9164-z

In the August 2008 issue (volume 83/number 2, pp 146–154), the following errors need to be amended:

#### Page 149

Results section, 1st column: Replace the sentence beginning with “Statistical” on lines 8 through 16 with:

“Statistical analysis showed significant effects of age ( $p < 0.0001$ ,  $p < 0.0001$ ) and type of bone ( $p < 0.0001$ ,  $p < 0.05$ ) for both 002 and 130 crystal directions, respectively. However, there were also statistically significant

interactions with both 002 ( $p < 0.001$ ) and 130 ( $p < 0.05$ ). Accordingly, the older crystals are “larger and/or more perfect” than the younger crystals, but this effect is greater in cancellous bone. The cortical bone mineral crystals are “larger and/or more perfect” than the cancellous bone crystals and this effect is greater for the younger bone crystals.”

Results section, 2nd column: Replace the sentence beginning with “Highly” on line 11 as well as the sentence beginning with “Significant” on line 14 with:

Both age ( $p < 0.05$ ) and type of bone ( $p < 0.001$ ) had statistically significant effects on Ca/P ratio and there was no interaction between these factors ( $p = 0.310$ ). The Ca/P ratio increased with age and was greater in cortical bone than cancellous bone.

#### Page 150

Fig. 2 legend correction: Table 2 should be Table 3

2nd column, line 1: Table 2 should be Table 3

2nd column, line 5: Table 2 should be Table 3

2nd column, line 5: Replace the sentence beginning “The interaction” with

“Both age ( $p < 0.0001$ ) and type of bone ( $p < 0.0001$ ) had statistically significant effects on labile  $\text{HPO}_4$ . The interaction between age is considered extremely significant for the  $\text{HPO}_4$  bands ( $p < 0.0001$ ); hence, age does not have the same effect at all values of bone type. The difference between labile  $\text{HPO}_4$  for cancellous and cortical bone is greater for the 1–3 month old bone than the 4–5 year bone.”

2nd column, lines 8 through 12, delete the sentence beginning with “There is a significantly” since they are replaced by the revision above.

We regret these errors.

The online version of the original article can be found under doi:10.1007/s00223-008-9164-z.

L. T. Kuhn · Y. Wu · J. L. Ackerman · M. J. Glimcher  
Laboratory for the Study of Skeletal Disorders  
and Rehabilitation, Department of Orthopedic Surgery,  
Children’s Hospital, Harvard Medical School, Boston, MA, USA

L. T. Kuhn (✉)  
Department of Reconstructive Sciences,  
University of Connecticut Health Center, MC1615, Farmington,  
CT 06107, USA  
e-mail: lkuhn@uchc.edu

M. D. Gryn timerpas  
Samuel Lunenfeld Research Institute, Mt. Sinai Hospital,  
Toronto, Canada

C. C. Rey  
Laboratoire de Physico-Chimie des Solides, Centre National de  
la Recherche Scientifique, Toulouse, France

Y. Wu · J. L. Ackerman  
Biomaterials Laboratory, Martinos Center,  
Department of Radiology, Massachusetts General Hospital,  
Charlestown, MA, USA
